# Supplementary material for: Thin supported MOF based mixed matrix membranes of Pebax® 1657 for biogas upgrade
Source: Royal Society of Chemistry journal article supplement (doi:10.1039/c8nj04769c), 2018-11-19
Supplement: c8nj04769c1.pdf [file c8nj04769c1.pdf]

## **Thin supported MOF based mixed matrix membranes of Pebax<sup>®</sup> 1657 for biogas upgrade**

Javier Sánchez-Laínez, Inés Gracia-Guillén, Beatriz Zornoza, Carlos Téllez and Joaquín Coronas\*

*Chemical and Environmental Engineering Department, Instituto de Nanociencia de Aragón (INA), Universidad de Zaragoza, 50018 Zaragoza, Spain. Email: coronas@unizar.es*

## Synthesis of MOF nanoparticles

---

ZIF-8. This synthesis was performed following a recipe based on a MeOH-water mixture<sup>1</sup> as solvent. 0.47 g of zinc nitrate hexahydrate ( $\text{Zn}(\text{NO}_3)_2 \cdot 6\text{H}_2\text{O}$ , >98%, Sigma Aldrich) was dissolved in 10 mL of methanol (MeOH, HPLC grade, Sharlau) and 10 mL of water. Besides, 1.0 g of 2-methylimidazole (mIm,  $\text{C}_4\text{H}_6\text{N}_2$ , >99%, Sigma Aldrich), was dissolved in 10 mL of MeOH, and the two solutions were mixed and stirred for 2 h. The final product was collected by centrifugation at 10,000 rpm, washed once with MeOH, and dried at 110 °C overnight.

UiO-66: 0.40 g of zirconium (IV) chloride ( $\text{ZrCl}_4$ ,  $\geq 99.5\%$ , Sigma-Aldrich) was dissolved in 100 mL of N,N-dimethylformamide (DMF, 99.8%, Sigma-Aldrich) at room temperature with the help of a ultrasound bath, before the addition of 0.28 g of benzene-1,4-dicarboxylic acid (BDC, 98%, Sigma-Aldrich) and 0.13 mL of distilled water. The obtained solution was later transferred into a stainless steel teflon-lined autoclave for a solvothermal process in a pre-heated oven at 120 °C for 24 h. After cooling to room temperature, the colloidal suspension was centrifuged at 10,000 rpm and the precipitated solid was rinsed three times with fresh DMF, followed by washing three times more with the same amount of MeOH. Finally, the MOF was activated in a furnace at 300 °C for 3 h, with a heating rate of 15 °C·min<sup>-1</sup>.

MIL-101(Cr): 0.5 g of chromium(III) chloride hexahydrate ( $\text{CrCl}_3 \cdot 6\text{H}_2\text{O}$ , 96%, Sigma-Aldrich) and 0.45 g of terephthalic acid (98%, Sigma-Aldrich) were dissolved in 26 mL of distilled water<sup>3</sup>. After mixing, the solution was maintained for 30 min at 180 °C in a microwave oven. The solid was separated by centrifugation at 10,000 rpm and washed with water. Then, the synthesized MOF was activated with DMF at 120 °C overnight and thereafter with MeOH for 12 h under reflux. Finally, the MIL-101(Cr) powder was dried at 100 °C overnight.

ZIF-7/8 core-shells. The ZIF-7/8 core-shells were prepared *via* post-synthetic modification of the above explained ZIF-8 nanoparticles<sup>4</sup>. An initial amount of benzimidazole (bIm, Sigma Aldrich) was added to DMF at 65 °C to obtain a concentration of 13 g/L. Once dissolved, ZIF-8 was added to the solution (3.3 g/L), which was stirred for 24 h. The solid was then collected by centrifugation at 10,000 rpm, washed three times with MeOH and dried at 110 °C overnight.

## Membrane characterization

---

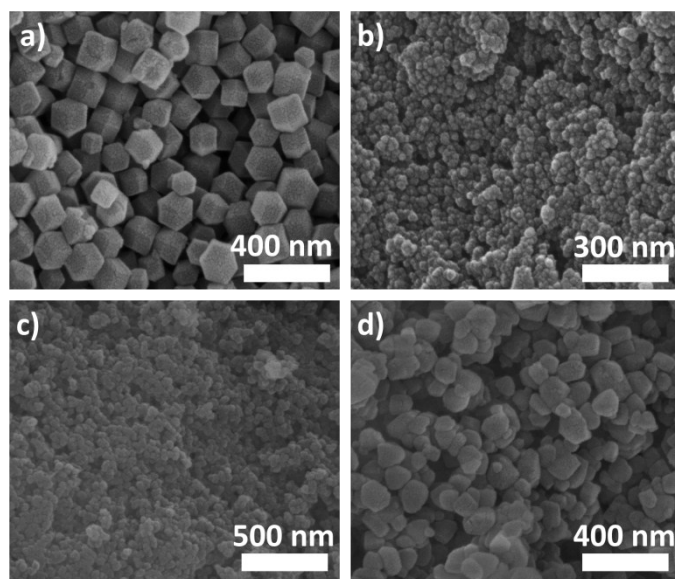

**Fig. S1.** SEM images of ZIF-8 (a), MIL-101(Cr) (b), UiO-66 (c) and ZIF-7/8 core-shell particles (d)

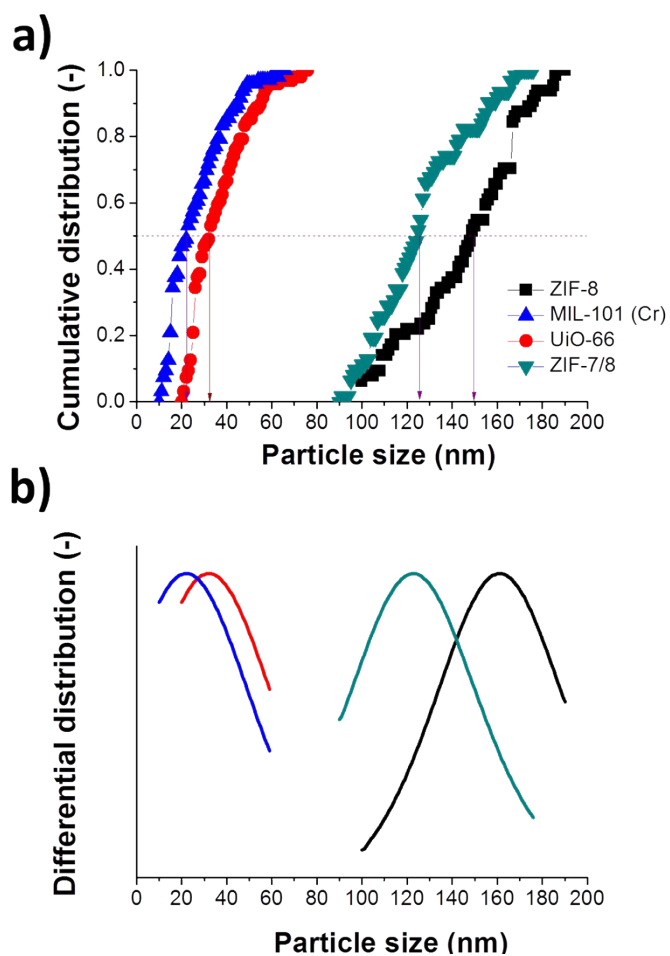

**Fig. S2.** Cumulative (a) and differential (b) particle size distribution of the ZIF-8, MIL-101(Cr), UiO-66 and ZIF-7/8 core-shells samples.

**Table S1.** Median particle sizes of the different MOFs used as filler according to the calculation of Fig. S2a.

| MOF                        | ZIF-8  | MIL 101 (Cr) | UiO-66 | ZIF-7/8 |
|----------------------------|--------|--------------|--------|---------|
| Average particle size (nm) | 150±60 | 25±19        | 33±13  | 124±22  |
| Mode (nm)                  | 161    | 22           | 32     | 123     |

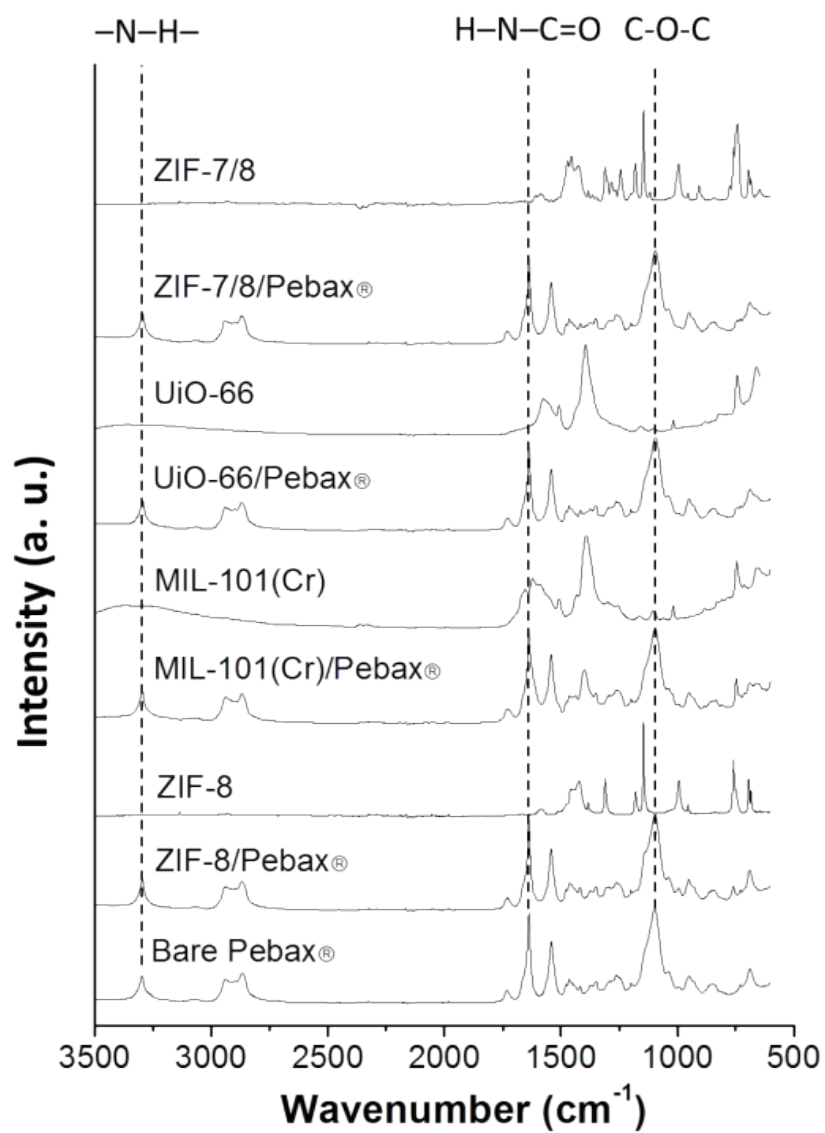

**Fig. S3.** FTIR spectra of Pebax® 1657 MMMs and MOF powders.

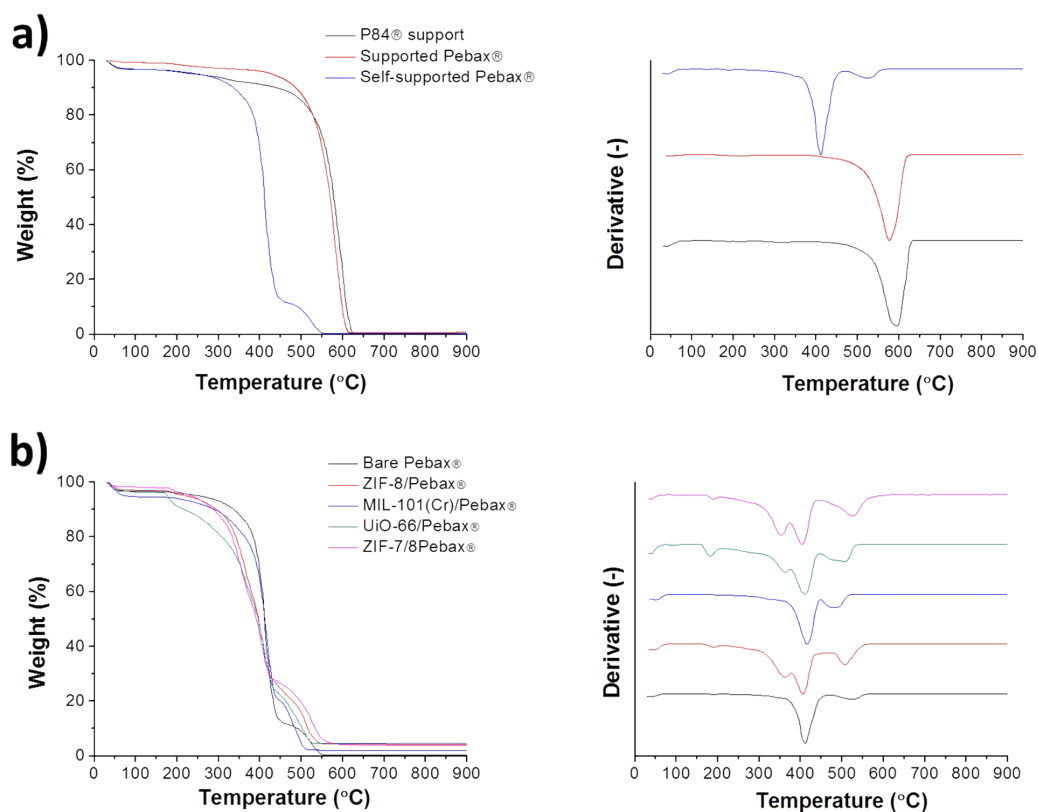

**Fig. S4.** TGA curves and derivatives in flowing air of pristine Pebax® 1657 membranes together with P84® support (a), and Pebax® 1657 MMMs (b).

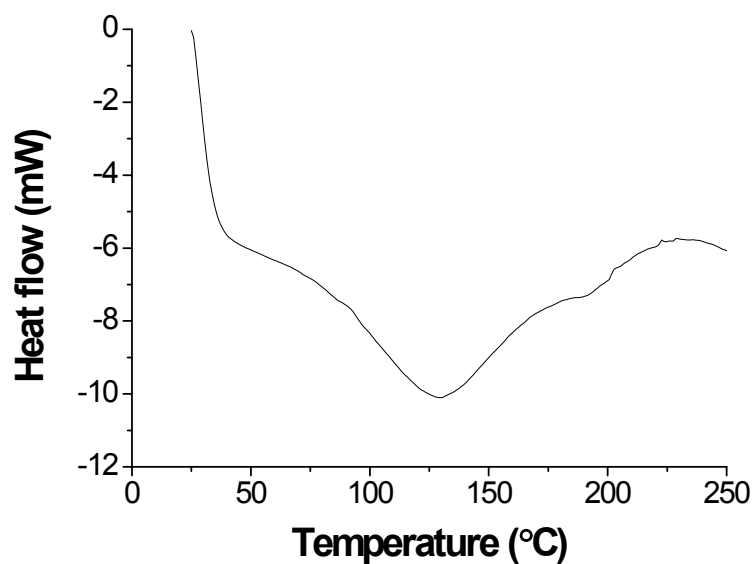

**Fig. S5.** DSC analysis of a Pebax® 1657 membrane. The analysis was performed in N<sub>2</sub> atmosphere using a heating rate of 10 °C·min<sup>-1</sup>.

## Gas separation performance

**Table S2.** Gas separation performance of P84® supports before and after PDMS coating. The testing conditions were 35 °C, 3 bar feed pressure and equimolar CO<sub>2</sub>/CH<sub>4</sub> mixture.

| Without PDMS                    |                                 |                                                  | With PDMS                       |                                 |                                                  |
|---------------------------------|---------------------------------|--------------------------------------------------|---------------------------------|---------------------------------|--------------------------------------------------|
| CO <sub>2</sub> permeance (GPU) | CH <sub>4</sub> permeance (GPU) | CO <sub>2</sub> /CH <sub>4</sub> selectivity (-) | CO <sub>2</sub> permeance (GPU) | CH <sub>4</sub> permeance (GPU) | CO <sub>2</sub> /CH <sub>4</sub> selectivity (-) |
| 270                             | 256                             | 1.1                                              | 55.1                            | 10.0                            | 5.5                                              |

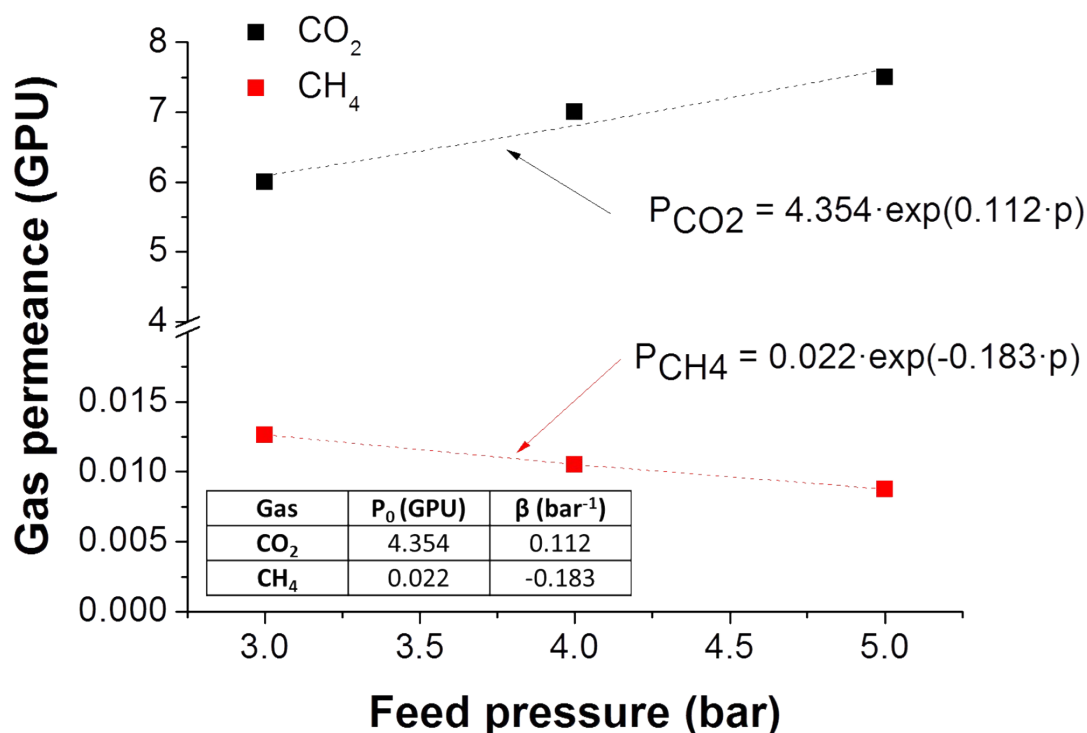

**Fig. S6.** Gas permeance of CO<sub>2</sub> and CH<sub>4</sub> with increasing pressure with numerical exponential fitting. The testing conditions were 35 °C, 3 bar feed pressure and equimolar CO<sub>2</sub>/CH<sub>4</sub> mixture.

The CO<sub>2</sub> and CH<sub>4</sub> gas permeances of the Pebax® 16657/P84® supported membranes have been fitted to an exponential tendency according to Equation S1:

$$P = P_0 \cdot \exp(\beta \cdot p) \quad (\text{Eq. S1})$$

Where  $P_0$  is the permeance coefficient (GPU) at zero feed pressure,  $p$  is the feed pressure (bar) and  $\beta$  is a constant (bar<sup>-1</sup>) characteristic of the penetrant-membrane system at a specified temperature.

## Robeson upper-bound adapted

**Table S3.** Literature review with the values that defined the upper-bound until the present (2018), including membrane thickness, CO<sub>2</sub> permeability in Barrer and CO<sub>2</sub>/CH<sub>4</sub> selectivity. The calculated CO<sub>2</sub> permeance in GPU is given.

| Polymer                           | Thickness (μm) | CO <sub>2</sub> permeability (Barrer) | CO <sub>2</sub> permeance (GPU) | $\alpha$ (CO <sub>2</sub> /CH <sub>4</sub> ) | Ref.          |
|-----------------------------------|----------------|---------------------------------------|---------------------------------|----------------------------------------------|---------------|
| PVSH doped polyaniline            | 20-30          | 0.029                                 | 0.002                           | 2200                                         | <sup>5</sup>  |
| Polypyrrole 6FDA/PMDA (25/75)-TAB | 50-120         | 120                                   | 1.41                            | 47.8                                         | <sup>6</sup>  |
| Poly(diphenyl acetylene) 3a       | 30-90          | 190                                   | 3.17                            | 33.4                                         | <sup>7</sup>  |
| Polyimide PI-5                    | 50-120         | 290                                   | 3.41                            | 31.5                                         | <sup>8</sup>  |
| Poly(diphenyl acetylene) 3e       | 50-120         | 330                                   | 3.88                            | 27.5                                         | <sup>7</sup>  |
| Poly(diphenyl acetylene) 3f       | 50             | 678                                   | 13.56                           | 20.2                                         | <sup>7</sup>  |
| Polyimide 6FDA-durene             | 20-70          | 958                                   | 21.29                           | 24.0                                         | <sup>9</sup>  |
| 6FDA-based polyimide (8)          | 28             | 1100                                  | 39.28                           | 17.7                                         | <sup>10</sup> |
| PTMSP                             | 46             | 2300                                  | 50.00                           | 18.4                                         | <sup>11</sup> |

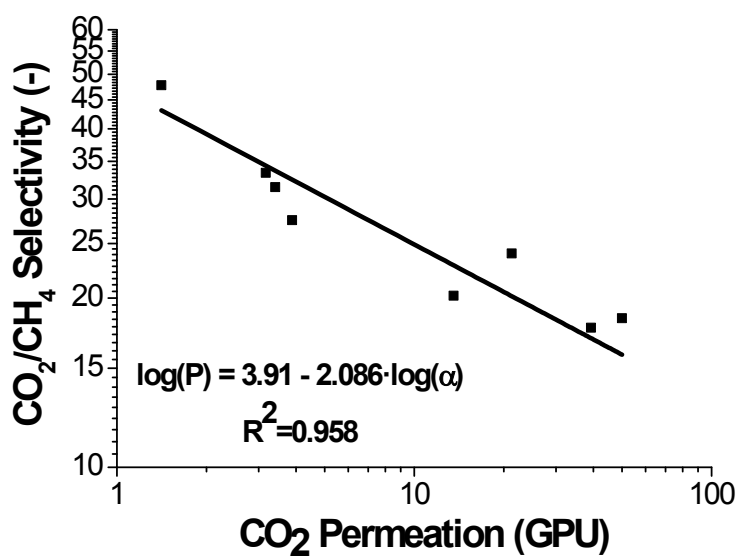**Fig. S7.** CO<sub>2</sub>/CH<sub>4</sub> bound defined in GPU at 35 °C. Squares represent the values in GPU of Table S3. The fitting equation of the linear fitting is also given with the R<sup>2</sup> value.



## Bibliography

---

- 1 N. Liédana, A. Galve, C. Rubio, C. Téllez and J. Coronas, *ACS Appl. Mater. Interfaces*, 2012, **4**, 5016-5021.
- 2 L. Hou, L. Wang, N. Zhang, Z. Xie and D. Dong, *Polym. Chem.*, 2016, **7**, 5828-5834.
- 3 N. A. Khan, I. J. Kang, H. Y. Seok and S. H. Jhung, *Chem. Eng. J.*, 2011, **166**, 1152-1157.
- 4 J. Sánchez-Láinez, A. Veiga, B. Zornoza, S. R. Balestra, S. Hamad, A. R. Ruiz-Salvador, S. Calero, C. Téllez and J. Coronas, *J. Mater. Chem. A*, 2017, **5**, 25601-25608.
- 5 H. Hachisuka, T. Ohara, K. Ikeda and K. Matsumoto, *J Appl Polym Sci*, 1995, **56**, 1479-1485.
- 6 C. M. Zimmerman and W. J. Koros, *J. Polym. Sci., Part B: Polym. Phys.*, 1999, **37**, 1235-1249.
- 7 Y. Shida, T. Sakaguchi, M. Shiotsuki, F. Sanda, B. D. Freeman and T. Masuda, *Macromolecules*, 2006, **39**, 569-574.
- 8 M. Al-Masri, H. R. Kricheldorf and D. Fritsch, *Macromolecules*, 1999, **32**, 7853-7858.
- 9 W. Lin and T. Chung, *J. Membr. Sci.*, 2001, **186**, 183-193.
- 10 C. Nagel, K. Günther-Schade, D. Fritsch, T. Strunskus and F. Faupel, *Macromolecules*, 2002, **35**, 2071-2077.
- 11 T. Mizumoto, T. Masuda and T. Higashimura, *J. Polym. Sci., Part A: Polym. Chem.*, 1993, **31**, 2555-2561.
